# Supplementary material
Source: PubMed Central journal article supplement (PMC2409112)
Supplement: NIHMS49878-supplement-06.pdf [file NIHMS49878-supplement-06.pdf]

| Marker         | Stage  | Condition              | Phenotype                                                  | n =     | # of experiments |
|----------------|--------|------------------------|------------------------------------------------------------|---------|------------------|
| <i>dbx1a</i>   | Prim-5 | 2-4ng conMO            | normal expression                                          | 30/30   | 2                |
|                |        | 1-2ng zic2aMO          | normal expression                                          | 30/30   | 2                |
| <i>dlx2a</i>   | Prim-5 | 2-4ng conMO            | normal expression                                          | 132/142 | 11               |
|                |        | 1-2ng zic2aMO          | reduced diencephalic expression domain                     | 129/137 | 7                |
|                |        | 2-4ng zic2a AUG+PROXMO | reduced diencephalic expression domain                     | 14/45   | 2                |
| <i>eomesa</i>  | Prim-5 | 2-4ng conMO            | normal expression                                          | 39/40   | 4                |
|                |        | 1-2ng zic2aMO          | reduced diencephalic expression domain                     | 21/36   | 2                |
| <i>emx1</i>    | Prim-5 | 2-4ng conMO            | normal expression                                          | 31/31   | 3                |
|                |        | 1-2ng zic2aMO          | expanded hypothalamic and telencephalic expression domains | 31/34   | 2                |
| <i>foxg1</i>   | Prim-5 | 2-4ng conMO            | normal expression                                          | 20/20   | 2                |
|                |        | 1-2ng zic2aMO          | normal expression                                          | 66/66   | 2                |
| <i>gli1</i>    | Prim-5 | 2-4ng conMO            | normal expression                                          | 16/16   | 2                |
|                |        | 1-2ng zic2aMO          | normal expression                                          | 36/36   | 2                |
| <i>gli2</i>    | Prim-5 | 2-4ng conMO            | normal expression                                          | 17/17   | 2                |
|                |        | 1-2ng zic2aMO          | normal expression                                          | 35/36   | 2                |
| <i>gli3</i>    | Prim-5 | 2-4ng conMO            | normal expression                                          | 20/20   | 2                |
|                |        | 1-2ng zic2aMO          | normal expression                                          | 35/35   | 2                |
| <i>isl1</i>    | Prim-5 | 2-4ng conMO            | normal expression                                          | 44/45   | 3                |
|                |        | 1-2ng zic2aMO          | loss of VRC domain and fusion of DRC domain                | 35/39   | 2                |
| <i>itnp</i>    | 2dpf   | 2-4ng conMO            | normal expression                                          | 14/14   | 2                |
|                |        | 1-2ng zic2aMO          | loss of expression                                         | 28/34   | 2                |
| <i>lef1</i>    | Prim-5 | 2-4ng conMO            | normal expression                                          | 31/34   | 4                |
|                |        | 1-2ng zic2aMO          | reduced dorsal hypothalamic expression domain              | 26/34   | 2                |
| <i>lhx1a</i>   | 2dpf   | 2-4ng conMO            | normal expression                                          | 20/21   | 3                |
|                |        | 1-2ng zic2aMO          | normal expression                                          | 23/23   | 2                |
| <i>nkx2.2a</i> | Prim-5 | 2-4ng conMO            | normal expression                                          | 30/30   | 2                |
|                |        | 1-2ng zic2aMO          | normal expression                                          | 34/34   | 2                |
| <i>otpb</i>    | Prim-5 | 2-4ng conMO            | normal expression                                          | 34/36   | 3                |
|                |        | 1-2ng zic2aMO          | reduced expression domain in preoptic area                 | 30/30   | 2                |
| <i>pax6a</i>   | Prim-5 | 2-4ng conMO            | normal expression                                          | 33/33   | 2                |
|                |        | 1-2ng zic2aMO          | reduced diencephalic expression domain                     | 32/34   | 2                |
| <i>ptc1</i>    | Prim-5 | 2-4ng conMO            | normal expression                                          | 37/37   | 3                |
|                |        | 1-2ng zic2aMO          | normal expression                                          | 36/36   | 1                |
| <i>rx3</i>     | Prim-5 | 2-4ng conMO            | normal expression                                          | 42/42   | 4                |
|                |        | 1-2ng zic2aMO          | normal expression                                          | 29/29   | 2                |
| <i>shha</i>    | Prim-5 | 2-4ng conMO            | normal expression                                          | 30/30   | 1                |
|                |        | 1-2ng zic2aMO          | normal expression                                          | 74/80   | 3                |
| <i>sim1</i>    | Prim-5 | 2-4ng conMO            | normal expression                                          | 30/31   | 2                |
|                |        | 1-2ng zic2aMO          | reduced expression domain in preoptic area                 | 27/36   | 2                |
| <i>titf1a</i>  | Prim-5 | 2-4ng conMO            | normal expression                                          | 19/19   | 2                |
|                |        | 1-2ng zic2aMO          | expanded hypothalamic expression domain                    | 33/40   | 2                |
| <i>titf1b</i>  | Prim-5 | 2-4ng conMO            | normal expression                                          | 36/36   | 4                |
|                |        | 1-2ng zic2aMO          | expanded hypothalamic expression domain                    | 28/32   | 2                |
